# Supplementary material for: Adjunctive Ketamine With Relapse Prevention–Based Psychological Therapy in the Treatment of Alcohol Use Disorder
Source: Atypon-hosted journal article supplement (doi:10.1176/appi.ajp.2021.21030277), 2022-01-11
Supplement: appi.ajp.2021.21030277.ds001.pdf [file appi.ajp.2021.21030277.ds001.pdf]

## Inclusion and Exclusion Criteria

### Inclusion Criteria:

- 18 to 65 years old;
- Meet either a) DSM-5 criteria for moderate/severe alcohol use disorder or b) DSM-IV criteria for alcohol abuse/dependence within the last 12 months;
- Currently abstinent from alcohol (breathlyser BAC level 0.00) and negative urine drug screen (participants testing positive for THC who do not have a history or current cannabis dependency may be included; participants testing positive for benzodiazepines and who do not have a history or current dependency for benzodiazepines may be included);
- Capacity to give informed consent as defined by GCP guidelines;
- Willing to wear SCRAM-X bracelet for active treatment;
- Females of childbearing potential and males must be willing to use an effective method of contraception (hormonal or barrier method of birth control; True abstinence) from the time consent is signed until 6 weeks after treatment discontinuation and inform the trial if pregnancy occurs. For the purpose of clarity, True abstinence is when this is in line with the preferred and usual lifestyle of the subject. Periodic abstinence (e.g., calendar, ovulation, symptothermal, post-ovulation methods), declaration of abstinence, spermicides only, withdrawal or lactational amenorrhoea method for the duration of a trial, are not acceptable methods of contraception;
- Females of childbearing potential must have a negative pregnancy test within 7 days prior to being registered for trial treatment and on day of first treatment.

### Exclusion Criteria:

- Currently taking any other relapse prevention medication or anti-depressants;
- Current uncontrolled hypertension (systolic 140mm Hg or greater and diastolic 90mm Hg or greater);
- Currently has BMI outside normal limits <16 or > 35
- Any relevant mental or physical health issues as determined by medically qualified personnel, which may include:
  - Current or history of psychosis as identified by DSM-5 or DSM-IV SCID;
  - Current or historical diagnosis of schizophrenia in a first degree relative;
  - Current co-morbid psychiatric diagnosis excluding depression and anxiety;
  - Previous or current diagnosis of substance dependence / severe substance misuse disorder as confirmed by the participant's GP or if the participant has sought professional help for their dependence;
  - Clinically relevant history of neuropsychological difficulties. One or more previous medically confirmed seizures, including seizures witnessed by an appropriate clinician, documented evidence from an EEG or a history consistent with a diagnosis of an epileptiform illness;
  - Current suicidal ideation, as judged clinically.
- Any medication deemed, by the trial medical professionals, to pose risk combined with ketamine which may include daily prescribed use of;
  - a. Barbiturates and/or narcotics
  - b. Atracurium and tubocurarine
  - c. Central nervous system (CNS) depressants (e.g. phenothiazines, sedating H1 – blockers or skeletal muscle relaxants)
  - d. Thiopental
  - e. Thyroid hormones
  - f. Antihypertensive agents
  - g. Theophylline and methylxanthines.

- Liver function tests that assess chronic liver damage (namely bilirubin, alanine aminotransferase (ALT), aspartate aminotransferase (AST)) > 3 times normal levels
- Where there are special warnings or precautions for use according to the SPC where the risk benefit ratio is not in favour of giving ketamine with assessment made by physical examination by medically qualified trial personnel, self-report or inspection of the medical notes. Current diagnosis of:
  - a. Acute intermittent porphyria
  - b. Dehydration or hypovolemia
  - c. Hyperthyroidism
  - d. Pulmonary or upper respiratory tract infection
  - e. Severe Coronary artery disease, Cerebrovascular accident or cerebral trauma
  - f. Known glaucoma or globe injuries
  - g. Cirrhosis
  - h. Epilepsy
  - i. Intracranial mass lesions, hydrocephalus, or presence of head injury (i.e. evidence of lasting impact of head injury that is affecting everyday functioning)
- Not willing to use effective contraception or (females) take pregnancy test;
- Allergic reaction to ketamine;
- >10 previous inpatient detoxifications from alcohol;
- Pregnant or breastfeeding;
- Allergies to excipients of IMP or placebo;
- Use of another IMP that is likely to interfere with the study medication within 3 months of study enrolment.

### List of measures and time points of assessment

| Visit #                       | Pre-Screening                  | Screening                | Baseline                | Treatment Phase        |                         |                        |                         |                        |                         | Follow Up                 |                           |
|-------------------------------|--------------------------------|--------------------------|-------------------------|------------------------|-------------------------|------------------------|-------------------------|------------------------|-------------------------|---------------------------|---------------------------|
|                               | -1                             | 1                        | 2                       | 3                      | 4                       | 5                      | 6                       | 7                      | 8                       | 9                         | 10                        |
| Timing                        | Within 12 weeks before visit 1 | 1-28 days before visit 2 | 1-28 days after visit 1 | 1-5 days after visit 2 | 4-21 days after visit 2 | 1-5 days after visit 4 | 4-21 days after visit 4 | 1-5 days after visit 6 | 4-21 days after visit 6 | 11-13 weeks after visit 2 | 23-25 weeks after visit 2 |
| Informed Consent              |                                | X                        |                         |                        |                         |                        |                         |                        |                         |                           |                           |
| Medical History               |                                | X                        |                         |                        |                         |                        |                         |                        |                         |                           |                           |
| Physical <sup>a</sup>         |                                | X                        |                         |                        |                         |                        |                         |                        |                         |                           |                           |
| SCID                          |                                | X                        |                         |                        |                         |                        |                         |                        |                         | X                         | X                         |
| Vital Signs <sup>b</sup>      |                                | X                        | X                       | X                      | X                       | X                      | X                       | X                      | X                       |                           |                           |
| Bloods <sup>c, d</sup>        |                                | X <sup>c</sup>           | X <sup>d</sup>          | X <sup>d</sup>            | X <sup>d</sup>            |
| Eligibility determination     | X                              | X                        | X                       |                        |                         |                        |                         |                        |                         |                           |                           |
| Urine Drug screen             |                                | X <sup>e</sup>           | X <sup>e</sup>          | X <sup>f</sup>         | X <sup>e</sup>          | X <sup>f</sup>         | X <sup>e</sup>          | X <sup>f</sup>         | X <sup>e</sup>          | X <sup>e</sup>            | X <sup>e</sup>            |
| Pregnancy Test I WOCBP        |                                | X                        | X                       |                        | X                       |                        | X                       |                        |                         |                           |                           |
| Breathalyser                  |                                | X                        | X                       | X                      | X                       | X                      | X                       | X                      | X                       | X                         | X                         |
| Randomisation                 |                                |                          | X                       |                        |                         |                        |                         |                        |                         |                           |                           |
| SCRAM-X fitting               |                                | X <sup>g</sup>           | X <sup>g</sup>          |                        |                         |                        |                         |                        |                         |                           |                           |
| IMP/Plac administration       |                                |                          | X                       |                        | X                       |                        | X                       |                        |                         |                           |                           |
| SCRAM-X checks                |                                |                          | X                       | X                      | X                       | X                      | X                       | X                      | X                       |                           |                           |
| Relapse-prevention based CBT  |                                |                          | X                       | X                      | X                       | X                      | X                       | X                      | X                       |                           |                           |
| Adverse Events review         |                                |                          | X                       | X                      | X                       | X                      | X                       | X                      | X                       | X                         | X                         |
| Concomitant Medication review |                                | X                        | X                       | X                      | X                       | X                      | X                       | X                      | X                       | X                         | X                         |

|                                        |  |   |   |   |   |   |   |   |   |   |   |
|----------------------------------------|--|---|---|---|---|---|---|---|---|---|---|
| Alcohol and Drug Use History           |  | X |   |   |   |   |   |   | X | X | X |
| BDI                                    |  | X | X |   | X |   | X |   | X | X | X |
| HAM-D                                  |  | X | X | X | X | X | X | X | X | X | X |
| Columbia Suicide Severity Rating Scale |  | X |   |   |   |   |   |   |   |   |   |
| POMS                                   |  |   | X | X | X | X | X | X | X | X | X |
| STAI                                   |  | X | X |   | X |   | X |   | X | X | X |
| ACQ-NOW                                |  | X | X | X | X | X | X | X | X | X | X |
| BPRS                                   |  | X | X | X | X | X | X | X | X | X | X |
| PSI                                    |  | X | X |   | X |   | X |   | X | X | X |
| Alcohol Timeline Follow Back           |  | X | X |   | X |   | X |   | X | X | X |
| Drink diary                            |  |   |   |   |   |   |   |   | X | X | X |
| Fagerstrom Nicotine Dependence         |  |   | X |   |   |   |   |   | X | X | X |
| Craving VAS                            |  |   | X | X | X | X | X | X | X | X | X |
| SF-12                                  |  |   | X |   |   |   |   |   | X | X | X |
| Prose Recall                           |  |   | X | X | X | X | X | X | X | X | X |
| Delay Discounting                      |  |   | X |   |   |   |   |   | X | X | X |
| Stop Signal Reaction Time              |  |   | X |   |   |   |   |   | X | X | X |
| Digit Span                             |  |   | X |   |   |   |   |   | X | X | X |
| Adverse effects VAS +                  |  |   | X | X | X | X | X | X | X | X | X |
| Pattern Recognition Memory Test        |  |   | X |   | X |   | X |   | X | X | X |

- a) Physical assessed by trained medic – height, weight, an examination of cardiovascular, respiratory, GI and neurological function to a level of detail that would be expected for a patient due to receive anaesthesia.
- b) Vital signs: oral/tympanic temperature, resting pulse, pulse oximetry and Blood Pressure.
- c) Bloods (Screening) – FBC (haemoglobin, white cell count, platelets, mean red cell volume); Liver function (Bilirubin, ALT, AST, Total Protein, Alkaline Phos (ALP), Albumin, Globulin, gamma-glutamyl transpeptidase (GGT)), Biochemistry (urea, sodium, potassium, glucose, calcium, thyroid stimulating hormone).
- d) Bloods (Study): BDNF; ketamine; Liver function (Bilirubin, ALT, AST, Total Protein, Alkaline Phos (ALP), Albumin, Globulin, gamma-glutamyl transpeptidase (GGT)).
- e) Urine Drug screen (Screening, infusion days and F-UP visits) - (methamphetamine, cocaine, THC, benzodiazepines, tricyclic antidepressants, barbiturates, phencyclidine, amphetamines, morphine, methadone, ketamine).
- f) Urine Drug screen (Non-infusion days, treatment phase) – (methamphetamine, cocaine, THC, benzodiazepines, tricyclic antidepressants, barbiturates, phencyclidine, amphetamines, morphine, methadone).
- g) SCRAM-X device can be fitted at any one of these visits.

**Sensitivity analysis 1: Relapse of alcohol use and percentage of days abstinent at 6 month follow-up: per protocol sample using observed data**

| <b>Outcome</b>                                                            | <b>Ketamine<br/>(n=38)</b>   | <b>Placebo<br/>(n=43)</b>       | <b>PT<br/>(n=38)</b>               | <b>PE<br/>(n=43)</b>               | <b>Ketamine + Ketamine<br/>PT (n=18 )<br/>+ PE<br/>(n=20)</b> | <b>Placebo + Placebo +<br/>PT<br/>(n=20)</b> | <b>Placebo + Placebo +<br/>PE<br/>(n=23)</b> | <b>Ketamine vs<br/>placebo<br/>OR<sup>2</sup> (95% CI)</b> | <b>Ketamine + PT vs<br/>Ketamine + PE<br/>OR<sup>2</sup> (95% CI)</b> | <b>Ketamine + PT<br/>vs placebo +PE<br/>OR<sup>2</sup> (95% CI)</b>        |                                                                          |
|---------------------------------------------------------------------------|------------------------------|---------------------------------|------------------------------------|------------------------------------|---------------------------------------------------------------|----------------------------------------------|----------------------------------------------|------------------------------------------------------------|-----------------------------------------------------------------------|----------------------------------------------------------------------------|--------------------------------------------------------------------------|
| Relapse <sup>3</sup> ; n/N (%)                                            | 25/38 (66)                   | 30/41 (73)                      | 24/37 (65)                         | 31/42 (74)                         | 11/18 (61)                                                    | 14/20 (70)                                   | 13/19 (68)                                   | 17/22 (77)                                                 | 0.70 (0.27; 1.84)                                                     | 0.67 (0.17; 2.59)                                                          | 0.48 (0.12; 1.91)                                                        |
|                                                                           |                              |                                 |                                    |                                    |                                                               |                                              |                                              |                                                            | <b>Ketamine vs<br/>placebo mean<br/>difference<br/>(95% CI)</b>       | <b>Ketamine + PT vs<br/>Ketamine + PE<br/>mean difference<br/>(95% CI)</b> | <b>Ketamine + PT<br/>vs placebo +PE<br/>mean difference<br/>(95% CI)</b> |
| Percentage days<br>abstinent <sup>4</sup> ; mean<br>(SD); median<br>[IQR] | 84.6 (17.7);<br>92 [43, 100] | 72.3<br>(26.6); 75<br>[12, 100] | 81.1<br>(24.2);<br>93 [12,<br>100] | 75.3<br>(22.9);<br>78 [26,<br>100] | 86.4 (18.1);<br>94 [48, 100]                                  | 83 (17.7);<br>87 [43, 100]                   | 76.4<br>(28.3); 92<br>[12, 100]              | 68.7<br>(25.0); 71<br>[26, 100]                            | 11.8 (1.8; 21.8)                                                      | 3.4 (-8.5; 15.3)                                                           | 16.9 (3.0; 30.9)                                                         |
| Timeline follow<br>back                                                   |                              |                                 |                                    |                                    |                                                               |                                              |                                              |                                                            |                                                                       |                                                                            |                                                                          |

<sup>1</sup>Per protocol population defined as receiving at least three infusions of either ketamine or placebo.

<sup>2</sup>Adjusted for site.

<sup>3</sup>Including only participants with confirmed relapse status; relapse on 1 or more days from baseline to participant's final follow-up to a minimum of 159 days, maximum of 180 days; or no relapse and no days with missing data on alcohol use from baseline to participant's final follow-up to a minimum of 159 days, maximum 180 days.

<sup>4</sup>Denominator is number of days out of participant's total follow-up days (maximum 180) with observed data.

PE: Psychoeducation; PT: Psychotherapy.

**Sensitivity analysis 2: Relapse of alcohol use and percentage of days abstinent at 6 month follow-up: intention to treat population using observed and imputed data**

| <b>Outcome</b>                                                                                 | <b>Ketamine<br/>(n=48)</b>    | <b>Placebo<br/>(n=48)</b>       | <b>PT<br/>(n=47)</b>             | <b>PE<br/>(n=49)</b>               | <b>Ketamine +<br/>PT (n=24)</b> | <b>Ketamine +<br/>PE (n=24)</b> | <b>Placebo +<br/>PT (n=23)</b>  | <b>Placebo +<br/>PE<br/>(n=25)</b> | <b>Ketamine vs<br/>placebo OR<sup>1</sup><br/>(95% CI)</b>      | <b>Ketamine + PT<br/>vs Ketamine +<br/>PE OR<sup>1</sup> (95%<br/>CI)</b>      | <b>Ketamine + PT<br/>vs placebo +PE<br/>OR<sup>1</sup> (95% CI)</b>      |
|------------------------------------------------------------------------------------------------|-------------------------------|---------------------------------|----------------------------------|------------------------------------|---------------------------------|---------------------------------|---------------------------------|------------------------------------|-----------------------------------------------------------------|--------------------------------------------------------------------------------|--------------------------------------------------------------------------|
| Relapse; n (%)                                                                                 | -                             | -                               | -                                | -                                  | -                               | -                               | -                               | -                                  | 0.73 (0.29;<br>1.83)                                            | 0.78 (0.23; 2.69)                                                              | 0.49 (0.13; 1.90)                                                        |
|                                                                                                |                               |                                 |                                  |                                    |                                 |                                 |                                 |                                    | <b>Ketamine vs<br/>placebo mean<br/>difference<br/>(95% CI)</b> | <b>Ketamine + PT<br/>vs Ketamine +<br/>PE mean<br/>difference (95%<br/>CI)</b> | <b>Ketamine + PT<br/>vs placebo +PE<br/>mean difference<br/>(95% CI)</b> |
| Percentage days<br>abstinent at 6-month<br>follow-up <sup>2</sup> ; mean<br>(SD); median [IQR] | 79.2 (23);<br>87 [24,<br>100] | 69.8<br>(27.5); 73<br>[12, 100] | 77<br>(26.1);<br>88 [12,<br>100] | 72.1<br>(25.3);<br>78 [19,<br>100] | 79.3 (23.7);<br>89 [26, 100]    | 79.1 (22.7);<br>85 [29, 100]    | 74.6<br>(28.6); 87<br>[12, 100] | 65.4<br>(26.2); 62<br>[22, 100]    | 10.1 (1.1; 19.0)                                                | 4.2 (-6.8; 15.2)                                                               | 15.9 (3.8; 28.1)                                                         |

<sup>1</sup>Adjusted for site.

<sup>2</sup>Denominator is number of days out of participant's total follow-up days (maximum 180) for participants with observed data for all days to final follow-up; imputed percentage otherwise.  
PE: Psychoeducation; PT: Psychotherapy.

**TABLE S1. Percentage of days abstinent at 6 month follow-up: intention to treat population using observed data**

| Outcome                                                                                      | Ketamine (n=48 )          |                           |     | Placebo (n=48)            |                           |     | PT (n=47 )                |                         |     | PE (n=49)                 |                           |     | Ketamine + PT (n=24) |                  |     | Ketamine + PE (n=24 ) |     |     | Placebo + PT (n=23 ) |     |     | Placebo + PE (n=25) |     |     | Ketamine vs placebo mean difference <sup>1</sup> (95% CI) |     |     | Ketamine + PT vs Ketamine + PE mean difference <sup>1</sup> (95% CI) |     |     | Ketamine + PT vs placebo +PE mean difference <sup>1</sup> (95% CI) |     |     |     |     |     |     |     |     |   |    |  |
|----------------------------------------------------------------------------------------------|---------------------------|---------------------------|-----|---------------------------|---------------------------|-----|---------------------------|-------------------------|-----|---------------------------|---------------------------|-----|----------------------|------------------|-----|-----------------------|-----|-----|----------------------|-----|-----|---------------------|-----|-----|-----------------------------------------------------------|-----|-----|----------------------------------------------------------------------|-----|-----|--------------------------------------------------------------------|-----|-----|-----|-----|-----|-----|-----|-----|---|----|--|
|                                                                                              | M                         | SD                        |     | M                         | SD                        |     | M                         | SD                      |     | M                         | SD                        |     | M                    | SD               |     | M                     | SD  |     | M                    | SD  |     | M                   | SD  |     | M                                                         | SD  |     | M                                                                    | SD  |     | M                                                                  | SD  |     | M   | SD  |     |     |     |     |   |    |  |
| Days alcohol use data collected <sup>2</sup>                                                 | 147                       | 51                        |     | 157                       | 43                        |     | 150                       | 50                      |     | 155                       | 45                        |     | 144                  | 56               |     | 150                   | 47  |     | 156                  | 44  |     | 159                 | 43  |     |                                                           |     |     |                                                                      |     |     |                                                                    |     |     |     |     |     |     |     |     |   |    |  |
|                                                                                              | Med                       | Min                       | Max | Med                       | Min                       | Max | Med                       | Min                     | Max | Med                       | Min                       | Max | Med                  | Min              | Max | Med                   | Min | Max | Med                  | Min | Max | Med                 | Min | Max | Med                                                       | Min | Max | Med                                                                  | Min | Max | Med                                                                | Min | Max | Med | Min | Max | Med | Min | Max |   |    |  |
|                                                                                              | 164                       | 1                         | 180 | 167                       | 1                         | 180 | 167                       | 1                       | 180 | 167                       | 1                         | 180 | 165                  | 1                | 180 | 164                   | 1   | 180 | 167                  | 1   | 180 | 167                 | 1   | 180 | 167                                                       | 1   | 180 |                                                                      |     |     |                                                                    |     |     |     |     |     |     |     |     |   |    |  |
| Percentage days abstinent <sup>3</sup> ; Timeline follow-back                                | M                         | SD                        |     | M                         | SD                        |     | M                         | SD                      |     | M                         | SD                        |     | M                    | SD               |     | M                     | SD  |     | M                    | SD  |     | M                   | SD  |     | M                                                         | SD  |     | M                                                                    | SD  |     | M                                                                  | SD  |     | M   | SD  |     | M   | SD  |     | M | SD |  |
| Percentage days abstinent <sup>3</sup> ; mean (SD); median [min, max] Timeline follow-back   | 84.4 (18.8); 92 [32, 100] | 74.4 (26.0); 84 [12, 100] |     | 82.4 (22.8); 93 [12, 100] | 76.5 (23.3); 83 [26, 100] |     | 86.4 (17.7); 94 [48, 100] | 82.5 (20); 89 [32, 100] |     | 78.3 (26.9); 92 [12, 100] | 70.7 (25.1); 74 [26, 100] |     | 10.1 (1.1; 19.0)     | 4.2 (-6.7; 15.2) |     | 15.9 (3.8; 28.1)      |     |     |                      |     |     |                     |     |     |                                                           |     |     |                                                                      |     |     |                                                                    |     |     |     |     |     |     |     |     |   |    |  |
| Percentage days abstinent <sup>3,4</sup> ; mean (SD); median [min, max] Timeline follow-back | -                         | -                         |     | -                         | -                         |     | -                         | -                       |     | -                         | -                         |     | 9.7 (1.0; 18.4)      | 4.3 (-5.8; 14.5) |     | 15.9 (3.9; 27.9)      |     |     |                      |     |     |                     |     |     |                                                           |     |     |                                                                      |     |     |                                                                    |     |     |     |     |     |     |     |     |   |    |  |
|                                                                                              |                           |                           |     |                           |                           |     |                           |                         |     |                           |                           |     |                      |                  |     |                       |     |     |                      |     |     |                     |     |     |                                                           |     |     |                                                                      |     |     |                                                                    |     |     |     |     |     |     |     |     |   |    |  |
|                                                                                              |                           |                           |     |                           |                           |     |                           |                         |     |                           |                           |     |                      |                  |     |                       |     |     |                      |     |     |                     |     |     |                                                           |     |     |                                                                      |     |     |                                                                    |     |     |     |     |     |     |     |     |   |    |  |

<sup>1</sup>Including only participants with confirmed relapse status; relapse on 1 or more days from baseline to participant’s final follow-up to a minimum of 159 days, maximum of 180 days; or no relapse and no days with missing data on alcohol use from baseline to participant’s final follow-up to a minimum of 159 days, maximum 180 days.

<sup>2</sup>Using observed data only from baseline until participant’s final follow-up; follow-up capped at maximum of 180 days.

<sup>3</sup>Denominator is number of days out of participant’s total follow-up days (maximum 180) with observed data.

<sup>4</sup>Adjusted for baseline alcohol consumption.

PE: Psychoeducation; PT: Psychotherapy; Med: Median; Min: Minimum; Max: Maximum

**TABLE S2. Secondary alcohol related outcomes at 3 month follow-up: intention to treat population using observed data**

| <b>Outcome</b>                                                                                                               | <b>Ketamine<br/>(n=48 )</b>  | <b>Placebo<br/>(n=48)</b>       | <b>PT<br/>(n=47)</b>               | <b>PE<br/>(n=49)</b>               | <b>Ketamine +<br/>PT (n=24)</b> | <b>Ketamine +<br/>PE (n=24)</b> | <b>Placebo +<br/>PT<br/>(n=23)</b> | <b>Placebo +<br/>PE<br/>(n=25)</b> | <b>Ketamine vs<br/>placebo mean<br/>difference<sup>1</sup><br/>(95% CI)</b> |
|------------------------------------------------------------------------------------------------------------------------------|------------------------------|---------------------------------|------------------------------------|------------------------------------|---------------------------------|---------------------------------|------------------------------------|------------------------------------|-----------------------------------------------------------------------------|
| Days alcohol use data collected; mean (SD); median [min, max]; 90 days' alcohol use data collected (baseline to day 90); n % | 80.7 (25.5);<br>35 (73)      | 83.8<br>(20.4); 40<br>(83)      | 81.1<br>(24.7);<br>38 (81)         | 83.3<br>(21.5);<br>37 (76)         | 78.7 (28.1);<br>17 (71)         | 82.7 (23.1);<br>18 (75)         | 83.7 (21);<br>21 (91)              | 83.9<br>(20.4); 19<br>(76)         | -                                                                           |
| Percentage days abstinent at 90 days <sup>3</sup> mean (SD), median [IQR]                                                    | 88.8 (14.5);<br>96 [38, 100] | 79.8<br>(23.2); 90<br>[18, 100] | 86.1<br>(20.5);<br>97 [18,<br>100] | 82.6<br>(19.1);<br>89 [38,<br>100] | 90.3 (12.4);<br>97 [66, 100]    | 87.3 (16.4);<br>94 [38, 100]    | 81.7<br>(26.1); 97<br>[18, 100]    | 78.1<br>(20.7); 82<br>[38, 100]    | 9.0 (1.3; 16.7)                                                             |
| Percentage days abstinent at 90 days <sup>3,4</sup> , mean (SD), median [IQR]                                                |                              |                                 |                                    |                                    |                                 |                                 |                                    |                                    | 8.8 (1.2; 16.2)                                                             |

<sup>1</sup>Adjusted for site.

<sup>2</sup>Using observed data only from baseline until follow-up capped at maximum of 90 days

<sup>3</sup>Adjusted for baseline alcohol consumption.

<sup>4</sup>Denominator is number of days out of participant's total follow-up days (maximum 90) with observed data.

PE: Psychoeducation; PT: Psychotherapy.

**TABLE S3. Exploratory analysis I. Linear regression models including drug treatment and therapy treatment: intention to treat population using observed data.**

|                       | Model I                  |                           | Model II                 |                           |
|-----------------------|--------------------------|---------------------------|--------------------------|---------------------------|
|                       | % days abstinent         | % days abstinent          | % days abstinent         | % days abstinent          |
|                       | 90 days <sup>3,4,5</sup> | 180 days <sup>3,4,5</sup> | 90 days <sup>4,5,6</sup> | 180 days <sup>4,5,6</sup> |
| Ketamine <sup>1</sup> | 8.9 (1.2; 16.6)          | 9.9 (1.0; 18.8)           | 9.0 (-1.9; 19.8)         | 11.5 (-1.0; 24.0)         |
| Therapy <sup>2</sup>  | 3.5 (-4.2; 11.2)         | 6.0 (-2.9; 14.9)          | 3.6 (-7.4; 14.6)         | 7.6 (-5.1; 20.3)          |
| Ketamine*Therapy      | -                        | -                         | -0.2 (-15.7; 15.4)       | -3.2 (-21.1; 14.7)        |

<sup>1</sup>Reference: placebo.

<sup>2</sup>Reference: psychoeducation.

<sup>3</sup>Denominator is number of days out of participant's total follow-up days (maximum 90) with observed data.

<sup>4</sup>Between group comparison reported as mean difference (95% confidence interval).

<sup>5</sup>Adjusted for site.

<sup>6</sup>Denominator is number of days out of participant's total follow-up days (maximum 180) with observed data.



**TABLE S4. Questionnaire outcomes at Baseline, 3 and 6 months**

|                                                  | <b>Ketamine</b> | <b>Placebo</b>  | <b>PT</b>       | <b>PE</b>       | <b>Ketamine + PT</b> | <b>Ketamine + PE</b> | <b>Placebo + PT</b> | <b>Placebo + PE</b> | <b>Ketamine vs placebo<sup>1</sup></b> |
|--------------------------------------------------|-----------------|-----------------|-----------------|-----------------|----------------------|----------------------|---------------------|---------------------|----------------------------------------|
| <b>SF-12 Mental</b>                              |                 |                 |                 |                 |                      |                      |                     |                     |                                        |
| Baseline                                         | 45.8 (9.9); 48  | 44.3 (12); 48   | 45.0 (11.3); 47 | 45.2 (10.8); 49 | 47.2 (8.9); 24       | 44.5 (10.9); 24      | 42.7 (13.2); 23     | 45.8 (10.8); 25     | -                                      |
| 3 month                                          | 51.9 (8.3); 43  | 47.5 (12.1); 43 | 48 (11.4); 41   | 51.2 (9.6); 45  | 51.8 (7.9); 21       | 51.9 (8.9); 22       | 43.9 (13.1); 20     | 50.6 (10.4); 23     | 3.9 (-0.2; 8.0)                        |
| 6 month                                          | 48.9 (10.8); 40 | 46.4 (11.2); 42 | 45.7 (12.2); 40 | 49.4 (9.6); 42  | 49.5 (12.0); 20      | 48.3 (9.8); 20       | 41.9 (11.4); 20     | 50.4 (9.6); 22      | 2.2 (-2.4; 6.7)                        |
| <b>SF-12 Physical</b>                            |                 |                 |                 |                 |                      |                      |                     |                     |                                        |
| Baseline                                         | 51.4 (7.2); 48  | 52.3 (7.3); 48  | 50.1 (7.6); 47  | 53.5 (6.5); 49  | 48.0 (7.2); 24       | 54.8 (5.5); 24       | 52.3 (7.5); 23      | 52.2 (7.1); 25      | -                                      |
| 3 month                                          | 52.5 (6.7); 43  | 54.1 (5.4); 43  | 52.2 (6.8); 41  | 54.3 (5.3); 45  | 49.9 (7.5); 21       | 54.9 (4.9); 22       | 54.7 (5.0); 20      | 53.7 (5.8); 23      | -1.3 (-3.3; 0.8)                       |
| 6 month                                          | 52.7 (6.5); 40  | 54.3 (5); 42    | 52.6 (6.5); 40  | 54.5 (4.9); 42  | 50.2 (7.4); 20       | 55.3 (4.3); 20       | 55.0 (4.6); 20      | 53.7 (5.4); 22      | -1.4 (-3.6; 0.8)                       |
| <b>PSI Subscale 1: Thought distortion</b>        |                 |                 |                 |                 |                      |                      |                     |                     |                                        |
| Baseline                                         | 0.8 (1.6); 48   | 1.1 (1.8); 48   | 0.7 (1.5); 47   | 1.2 (1.9); 49   | 0.5 (0.8); 24        | 1.1 (2.2); 24        | 1.0 (2.0); 23       | 1.2 (1.7); 25       | -                                      |
| 3 month                                          | 0.4 (1.0); 42   | 0.2 (0.6); 43   | 0.2 (0.7); 41   | 0.4 (0.9); 44   | 0.2 (0.9); 21        | 0.5 (1.0); 21        | 0.2 (0.5); 20       | 0.2 (0.7); 23       | 0.2 (-0.1; 0.5)                        |
| 6 month                                          | 0.4 (1.2); 40   | 0.4 (1.1); 42   | 0.4 (1.2); 40   | 0.5 (1.1); 42   | 0.3 (0.8); 20        | 0.6 (1.4); 20        | 0.5 (1.5); 20       | 0.4 (0.7); 22       | 0.1 (-0.4; 0.5)                        |
| <b>PSI Subscale 2: Perception/distortion</b>     |                 |                 |                 |                 |                      |                      |                     |                     |                                        |
| Baseline                                         | 0.5 (1.4); 48   | 0.7 (1.6); 48   | 0.6 (1.5); 47   | 0.6 (1.5); 49   | 0.3 (1.1); 24        | 0.6 (1.7); 24        | 0.8 (1.9); 23       | 0.6 (1.3); 25       | -                                      |
| 3 month                                          | 0.3 (1.0); 42   | 0.4 (0.8); 43   | 0.4 (0.9); 41   | 0.3 (0.9); 44   | 0.4 (1.2); 21        | 0.3 (0.7); 21        | 0.4 (0.7); 20       | 0.4 (1); 23         | -0.1 (-0.4; 0.3)                       |
| 6 month                                          | 0.1 (0.4); 40   | 0.5 (1.2); 42   | 0.5 (1.1); 40   | 0.2 (0.7); 42   | 0.1 (0.4); 20        | 0.1 (0.4); 20        | 0.8 (1.4); 20       | 0.2 (0.9); 22       | -0.3 (-0.7; 0.0)                       |
| <b>PSI Subscale 3: Cognitive disorganisation</b> |                 |                 |                 |                 |                      |                      |                     |                     |                                        |
| Baseline                                         | 5.6 (4.5); 48   | 5.2 (4.8); 48   | 5.2 (4.6); 47   | 5.6 (4.7); 49   | 5.3 (4.8); 24        | 5.9 (4.2); 24        | 5.1 (4.6); 23       | 5.3 (5.2); 25       | -                                      |
| 3 month                                          | 3.0 (4.0); 42   | 3.7 (3.5); 43   | 3.5 (3.5); 41   | 3.3 (4.0); 44   | 2.8 (3.6); 21        | 3.2 (4.5); 21        | 4.2 (3.4); 20       | 3.3 (3.5); 23       | -1.0 (-2.3; 0.2)                       |
| 6 month                                          | 3.2 (4.0); 40   | 4.3 (5.0); 42   | 4.0 (4.3); 40   | 3.5 (4.8); 42   | 3.0 (4.4); 20        | 3.4 (3.7); 20        | 5.0 (4.0); 20       | 3.6 (5.7); 22       | -1.3 (-3.1; 0.5)                       |
| <b>PSI Subscale 4: Anhedonia</b>                 |                 |                 |                 |                 |                      |                      |                     |                     |                                        |
| Baseline                                         | 4.6 (3.6); 48   | 5.8 (4.2); 48   | 5.4 (4.1); 47   | 4.9 (3.7); 49   | 4.9 (3.6); 24        | 4.2 (3.5); 24        | 6.0 (4.6); 23       | 5.6 (3.9); 25       | -                                      |
| 3 month                                          | 3.0 (3.2); 42   | 5.6 (3.8); 43   | 4.5 (3.7); 41   | 4.1 (3.8); 44   | 2.9 (2.5); 21        | 3.1 (3.8); 21        | 6.3 (4.0); 20       | 5.0 (3.6); 23       | -1.8 (-3.1; -0.5)                      |
| 6 month                                          | 4.0 (3.3); 40   | 5.4 (3.8); 42   | 5.0 (4.1); 40   | 4.3 (3.2); 42   | 3.4 (3.2); 20        | 4.5 (3.5); 20        | 6.7 (4.4); 20       | 4.2 (2.9); 22       | -0.9 (-2.4; 0.5)                       |
| <b>PSI Subscale 5: Manic experience</b>          |                 |                 |                 |                 |                      |                      |                     |                     |                                        |
| Baseline                                         | 3.5 (1.9); 48   | 3.5 (2.3); 48   | 3.3 (2.0); 47   | 3.7 (2.1); 49   | 3.2 (1.8); 24        | 3.7 (2.0); 24        | 3.3 (2.3); 23       | 3.7 (2.3); 25       | -                                      |
| 3 month                                          | 2.7 (1.9); 42   | 3.3 (1.8); 43   | 3.0 (1.6); 41   | 3.0 (2.0); 44   | 2.7 (1.6); 21        | 2.8 (2.2); 21        | 3.4 (1.6); 20       | 3.3 (1.9); 23       | -0.6 (-1.3; 0.0)                       |
| 6 month                                          | 3.4 (2.1); 40   | 3.4 (2.0); 42   | 3.6 (2.1); 40   | 3.2 (2.0); 42   | 3.3 (2.3); 20        | 3.5 (2.0); 20        | 3.9 (2.0); 20       | 2.9 (1.9); 22       | -0.1 (-0.9; 0.8)                       |
| <b>PSI Subscale 6: Paranoia</b>                  |                 |                 |                 |                 |                      |                      |                     |                     |                                        |
| Baseline                                         | 1.0 (1.7); 48   | 1.3 (2.5); 48   | 1.5 (2.4); 47   | 0.9 (1.9); 49   | 1.3 (2.2); 24        | 0.7 (1.1); 24        | 1.6 (2.6); 23       | 1.0 (2.4); 25       | -                                      |
| 3 month                                          | 0.4 (1.0); 42   | 0.5 (1.4); 43   | 0.5 (1.5); 41   | 0.4 (1.0); 44   | 0.4 (1.0); 21        | 0.4 (1.1); 21        | 0.6 (1.9); 20       | 0.5 (0.9); 23       | -0.1 (-0.6; 0.4)                       |
| 6 month                                          | 0.5 (1.5); 40   | 0.9 (1.9); 42   | 0.8 (1.8); 40   | 0.6 (1.6); 42   | 0.5 (1.4); 20        | 0.6 (1.6); 20        | 1.2 (2.1); 20       | 0.7 (1.6); 22       | -0.4 (-0.9; 0.2)                       |
| <b>ACQ Total</b>                                 |                 |                 |                 |                 |                      |                      |                     |                     |                                        |
| Baseline                                         | 2.7 (1.1); 48   | 2.6 (1.2); 48   | 2.8 (1.3); 47   | 2.6 (1.0); 49   | 2.9 (1.2); 24        | 2.6 (1.1); 24        | 2.8 (1.4); 23       | 2.5 (1.1); 25       | -                                      |
| 3 month                                          | 1.9 (1.0); 43   | 2.1 (1.1); 43   | 1.9 (1.0); 41   | 2.0 (1.1); 45   | 1.8 (0.9); 21        | 1.9 (1.1); 22        | 2.1 (1.1); 20       | 2.1 (1.0); 23       | -0.3 (-0.8; 0.1)                       |
| 6 month                                          | 1.9 (0.8); 40   | 2.2 (0.9); 42   | 2.0 (1.0); 40   | 2.1 (0.8); 42   | 1.7 (0.9); 20        | 2.1 (0.6); 20        | 2.4 (1.0); 20       | 2.1 (0.9); 22       | -0.4 (-0.7; 0.0)                       |
| <b>FTND<sup>2</sup></b>                          |                 |                 |                 |                 |                      |                      |                     |                     |                                        |
| Baseline                                         | 3.9 (2.4); 12   | 2.9 (1.9); 12   | 4.2 (2.2); 13   | 2.5 (1.8); 11   | 4.8 (2.4); 8         | 2.3 (1.0); 4         | 3.4 (1.5); 5        | 2.6 (2.1); 7        | NP                                     |
| 3 month                                          | 2.7 (2.8); 10   | 3.0 (2.4); 11   | 4.1 (2.0); 10   | 1.7 (2.4); 11   | 4.2 (2.6); 6         | 0.5 (0.6); 4         | 4.0 (0.8); 4        | 2.4 (2.8); 7        | NP                                     |
| 6 month                                          | 3.5 (3.1); 10   | 1.8 (1.6); 10   | 4.4 (2.4); 10   | 0.9 (1.0); 10   | 5.0 (3.0); 6         | 1.3 (1.3); 4         | 3.5 (0.6); 4        | 0.7 (0.8); 6        | NP                                     |

<sup>1</sup>Adjusted for site and baseline score. <sup>2</sup>Includes participants who were smokers at baseline only. NR: Analysis not performed due to small numbers. Outcomes are mean (SD), n. PE:

Psychoeducation; PT: Psychotherapy.



**FIGURE S2. Average ketamine blood levels by drug condition**

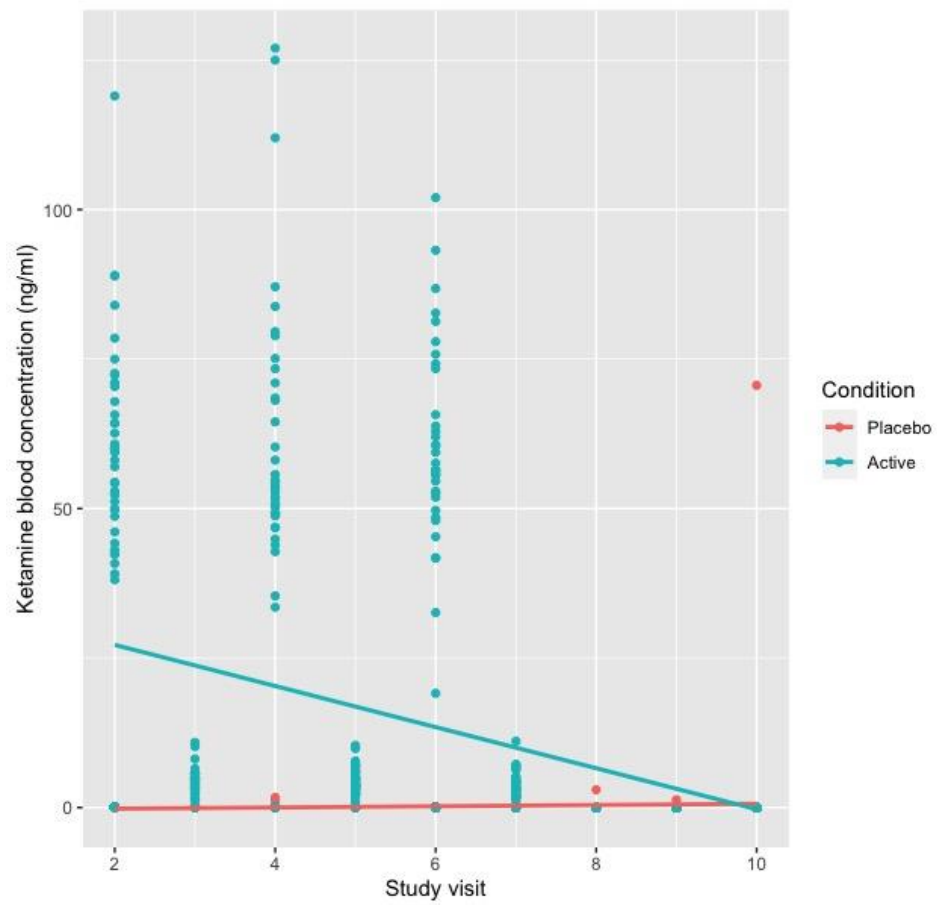

Infusions were administered at visits 2, 4, and 6. Positive ketamine readings in the placebo condition or outside the active treatment period were consistent with self-reported ketamine use.

### FIGURE S3. Liver function results

#### ALT by condition

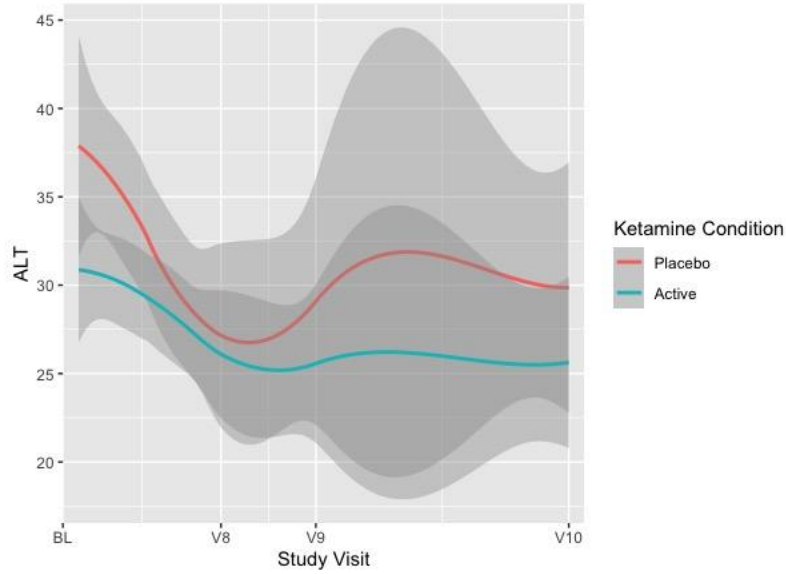

Lines fitted using LOESS curve smoothing

#### AST by condition

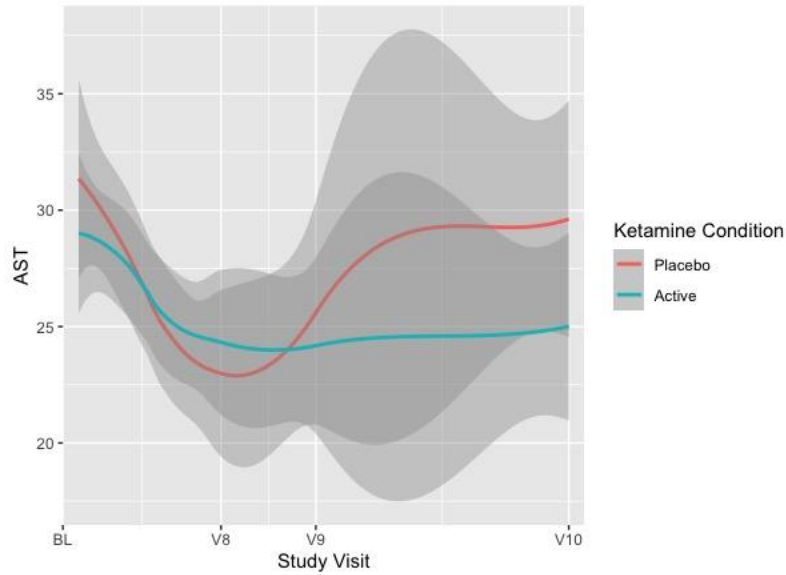

Lines fitted using LOESS curve smoothing

### Gamma GT by condition

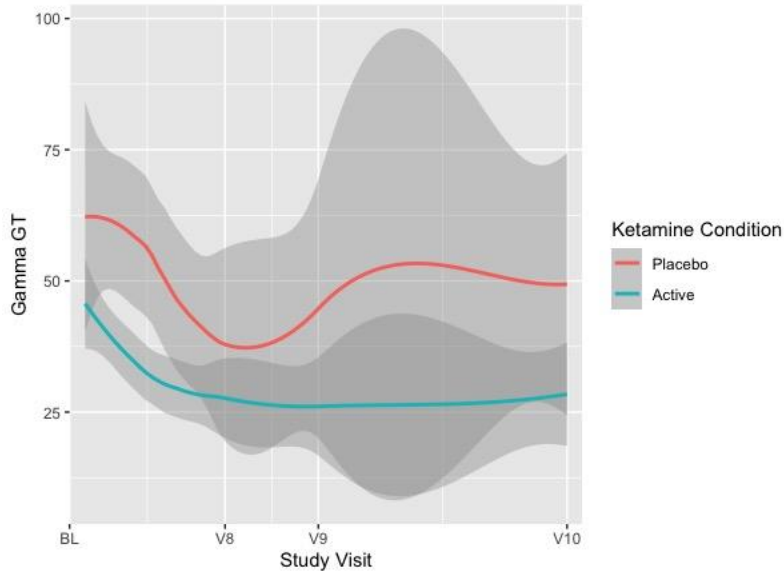

Lines fitted using LOESS curve smoothing

### Bilirubin by condition

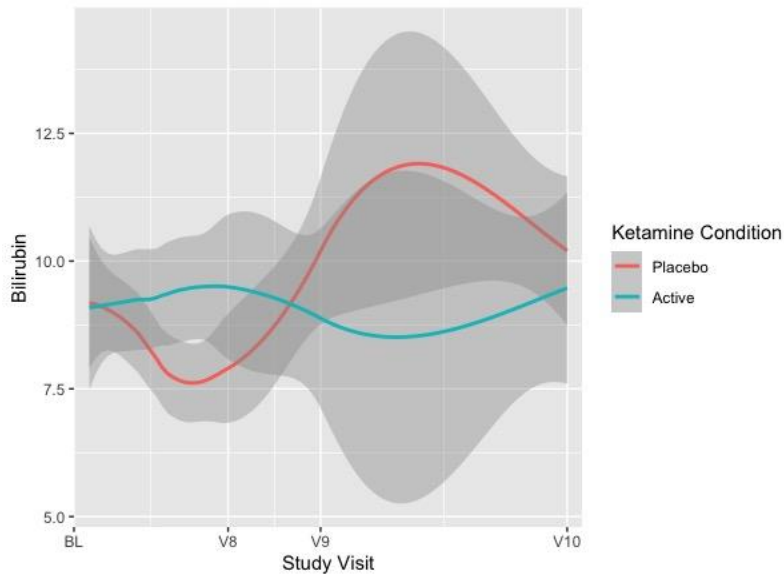

Lines fitted using LOESS curve smoothing

## Subjective drug effects

### Dizziness

Infusions 1, ketamine: mean=8.4, SD=3.5; placebo: mean=2.0, SD=0.1

Infusions 2, ketamine: mean=8.5, SD=3.4; placebo: mean= - , SD= -

Infusions 3, ketamine: mean=8.5, SD=3.5; placebo: mean= - , SD= -

### Out of body experiences

Infusions 1, ketamine: mean=7.7, SD=3.8; placebo: mean=5.0, SD=0.6

Infusions 2, ketamine: mean=7.8, SD=4.0; placebo: mean=4.0, SD=0.7

Infusions 3, ketamine: mean=7.5, SD=3.8; placebo: mean=5.0, SD=0.6

### Altered reality perception

Infusions 1, ketamine: mean=9.2, SD=1.9; placebo: mean=2.5, SD=0.5

Infusions 2, ketamine: mean=8.6, SD=2.7; placebo: mean=2.4, SD=0.5

Infusions 3, ketamine: mean=8.8, SD=2.9; placebo: mean=4.0, SD=0.5

### Altered time perception

Infusions 1, ketamine: mean=8.8, SD=2.8; placebo: mean=3.3, SD=0.9

Infusions 2, ketamine: mean=8.4, SD=3.1; placebo: mean=3.6, SD=1.4

Infusions 3, ketamine: mean=8.8, SD=3.3; placebo: mean=3.0, SD=0.7
